# Supplementary material for: Aggregation induced emission enhancement by plasmon coupling of noble metal nanoparticles
Source: Royal Society of Chemistry journal article supplement (doi:10.1039/c9qm00455f), 2019-01-01
Supplement: c9qm00455f1.pdf [file c9qm00455f1.pdf]

## Aggregation Induced Emission Enhancement by Plasmon Coupling of Noble Metal Nanoparticles

Jiangling He,<sup>a,b</sup> Shuang Li,<sup>c</sup> Da Lyu,<sup>a,b</sup> Dingfeng Zhang,<sup>c</sup> Xiao Wu,<sup>c</sup> and Qing-Hua Xu<sup>\*a,b</sup>

<sup>a</sup>Department of Chemistry, National University of Singapore, 3 Science Drive 3, Singapore 117543

<sup>b</sup>National University of Singapore (Suzhou) Research institute, Suzhou 215123, P. R. China

<sup>c</sup>Institute of Polymer Optoelectronic Materials and Devices, State Key Laboratory of Luminescent Materials and Devices, South China University of Technology, Guangzhou 510640, P. R. China

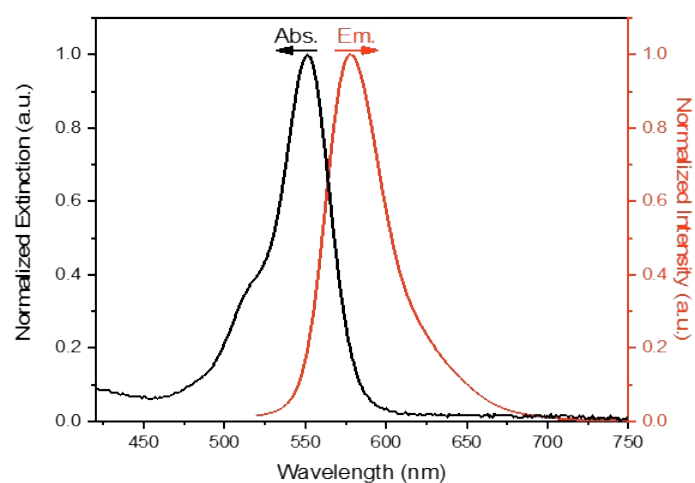

**Figure S1** Absorption and fluorescence spectra of RiTC aqueous solution.

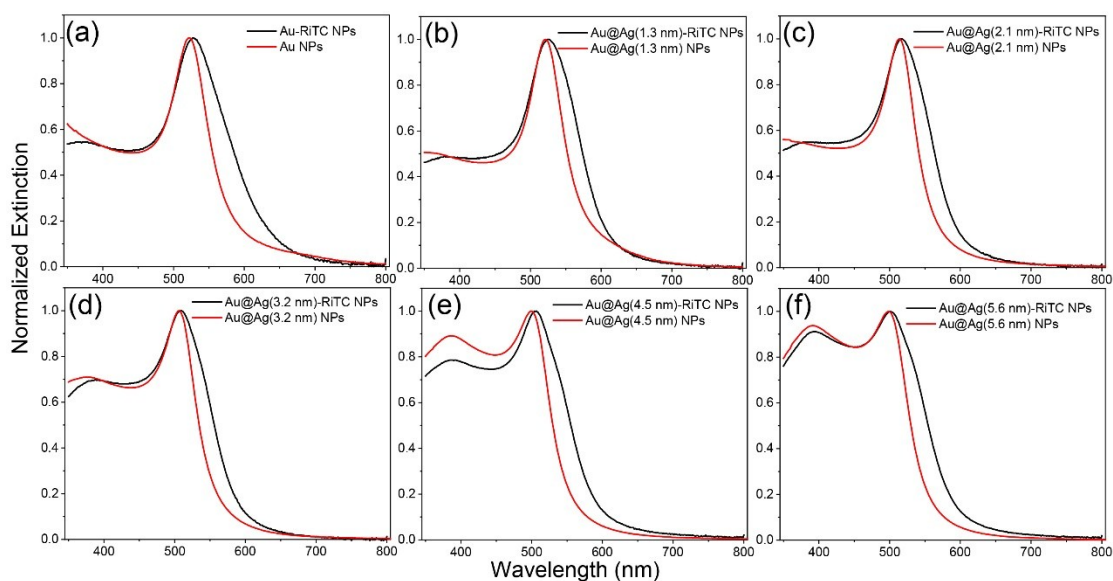

**Figure S2:** Extinction spectra of Au@Ag NPs and Au@Ag-RiTC NPs with different Ag shell thicknesses. Ag shell thicknesses is 0 nm (a), 1.3 nm (b), 2.1 nm (c), 3.2 nm (d), 4.5 nm (e), and 5.6 nm (f).

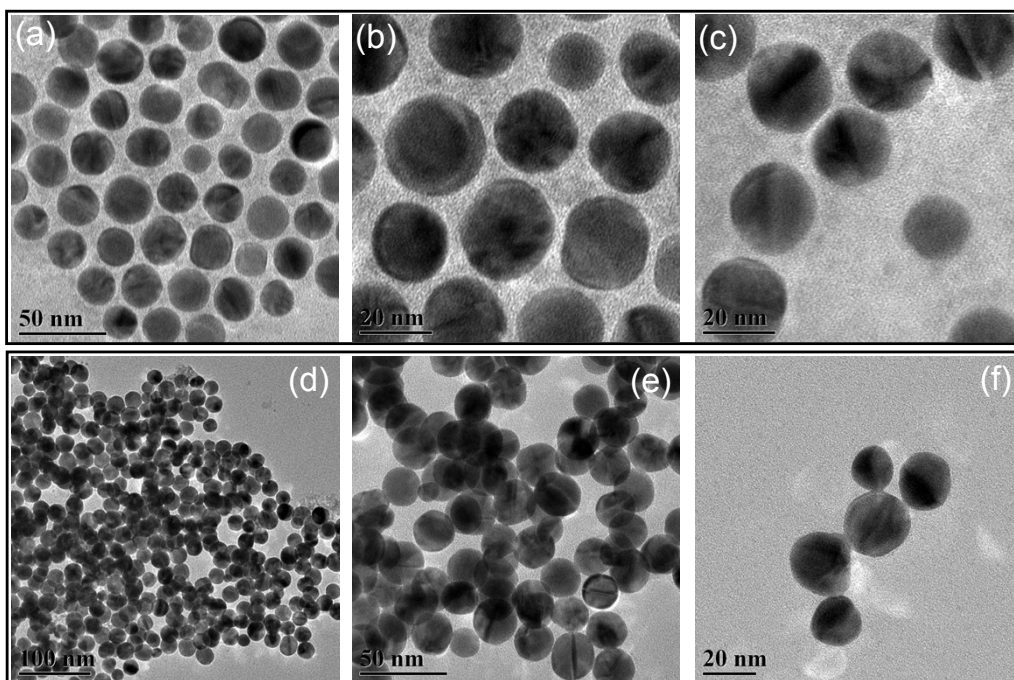

**Figure S3** (a-c) and (d-f) Typical TEM images of monodisperse Au-RiTC NPs and aggregated Au-RiTC NPs at different magnifications, respectively.

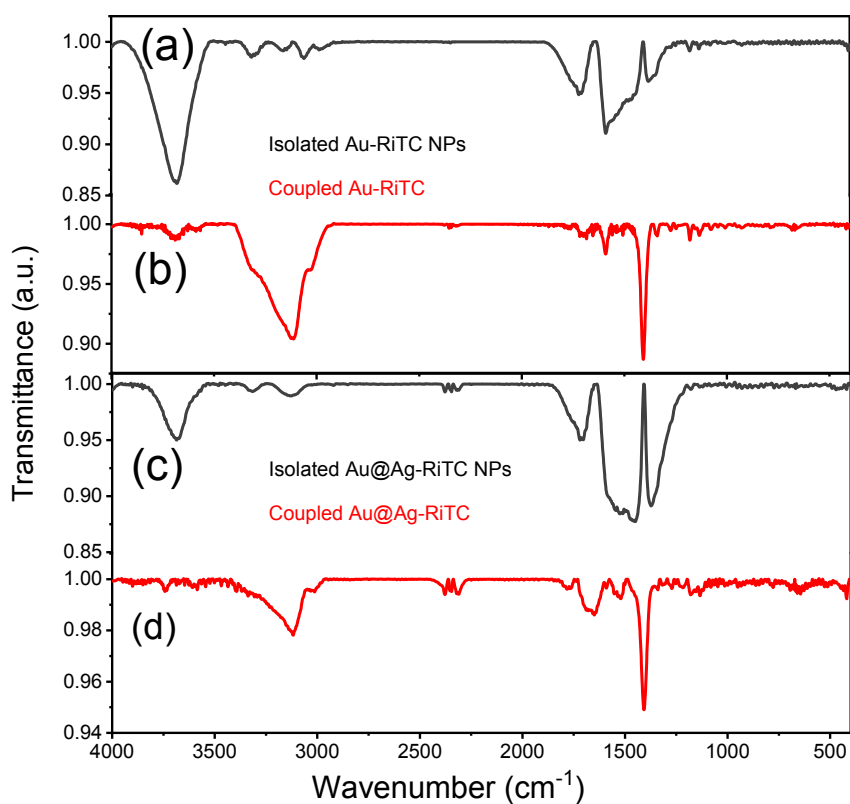

**Figure S4** FT-IR spectra of (a-b) Au-RiTC NPs and (c-d) Au@Ag(5.6 nm)-RiTC NPs before and after aggregations, respectively.

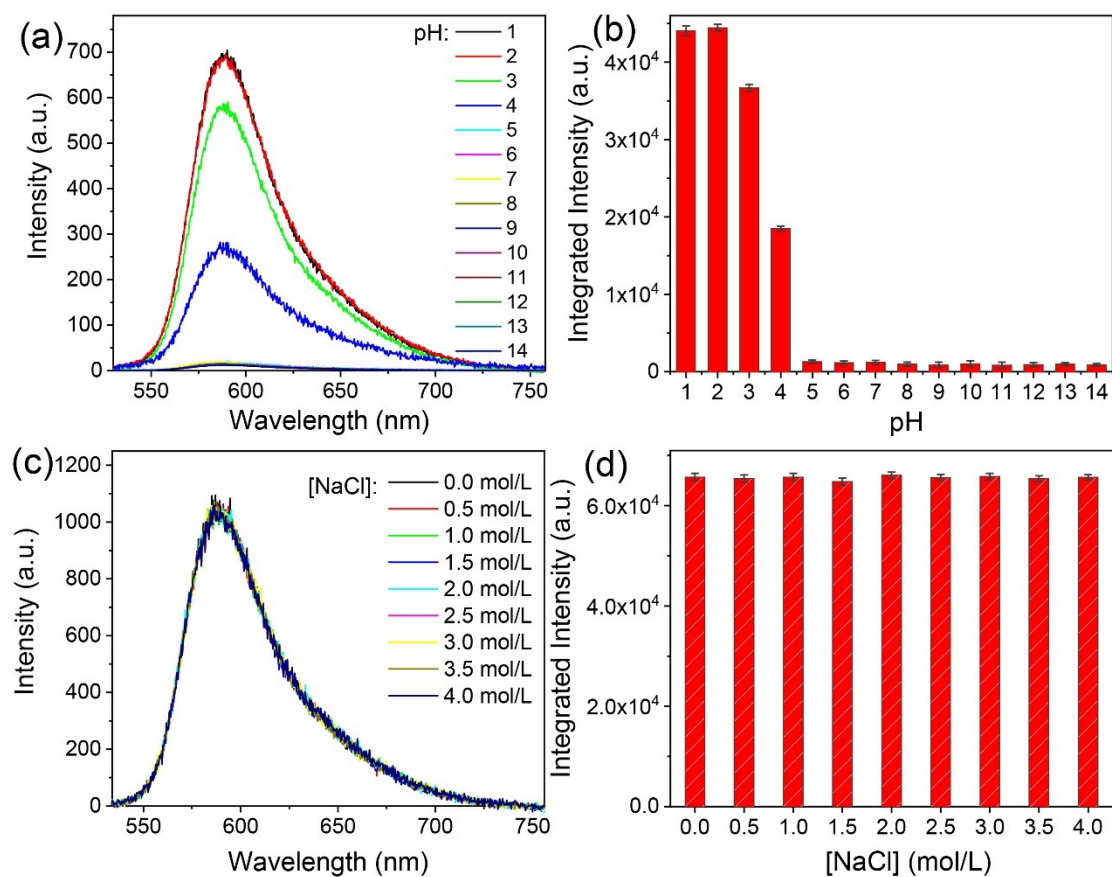

**Figure S5** (a) and (c) Emission spectra of as-prepared Au@Ag(5.6 nm)-RiTC sample after introduction of cysteine molecules at various pH values and various NaCl concentrations (mol/L), respectively. (b) and (d) Integrated fluorescence intensity of this sample versus pH values and versus [NaCl], respectively.

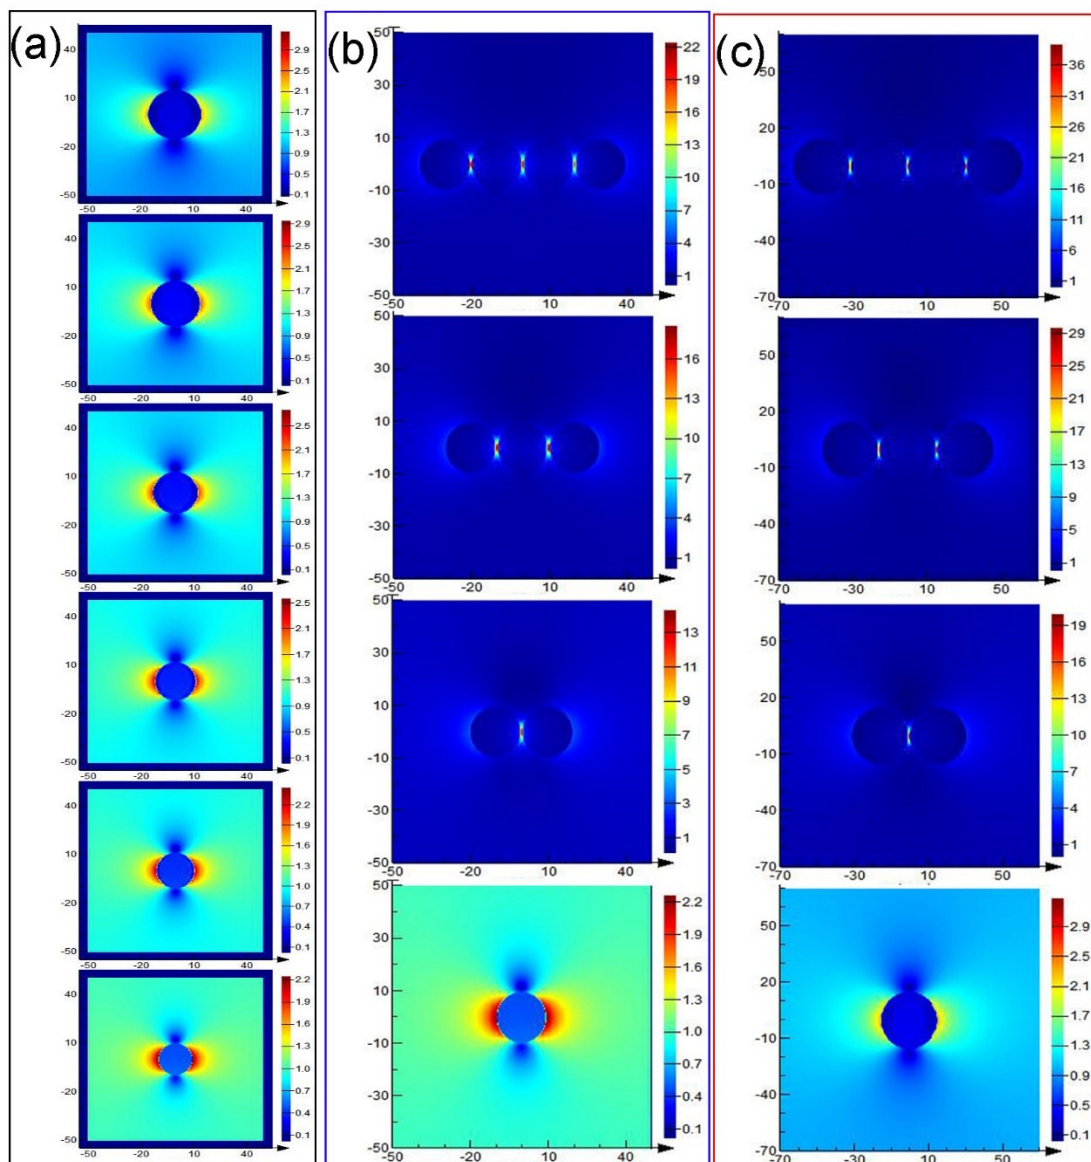

**Figure S6** (a) Simulated electric field of Au@Ag NPs with shell thicknesses of 0, 1.3, 2.1, 3.2, 4.5, and 5.6 nm from bottom to top. (b) and (c) Simulated electric field of Au NPs (19 nm) and Au@Ag(5.6 nm) NPs monomer, dimer, trimer, and tetramer, respectively. The wavelength of 520 nm was chosen to mimic the experimental results.

Finite-Difference Time-Domain (FDTD) simulation: The numerical simulations were conducted by Lumerical FDTD solution. The optical materials of Au and Ag were taken from Au (Gold)-Palik and Ag (Silver)-Palik (0-2  $\mu\text{m}$ ), respectively. The gap between metal NPs was 1 nm. The background refractive index was set to 1.0 representing aqueous solution, and Boundary condition was stretched coordinate PML, Total-field Scattered-field Source (TFSF Source) was used as source.

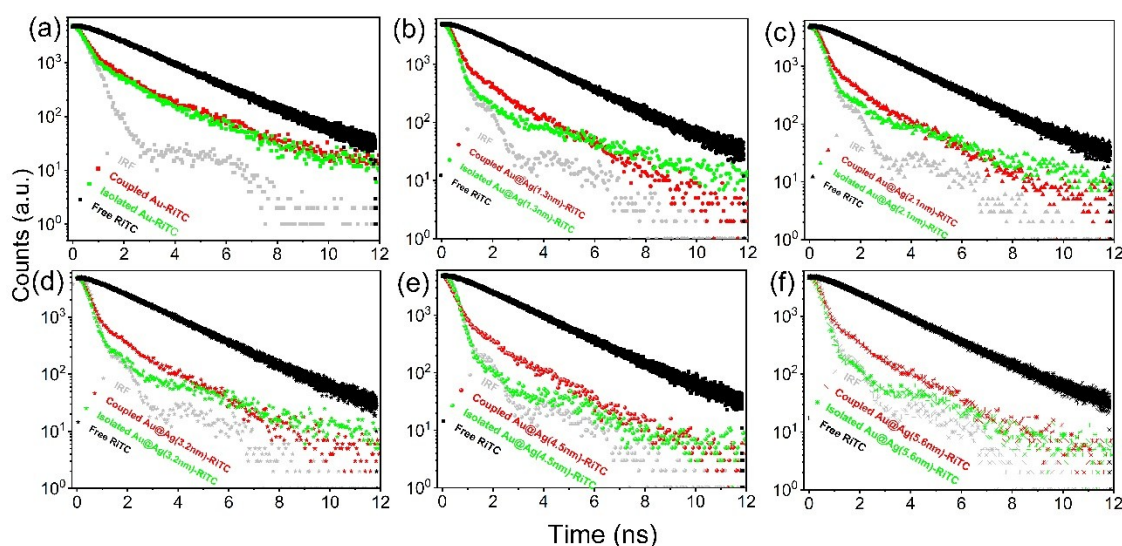

**Figure S7** (a)-(f) Exhibit fluorescence lifetime curves of free RiTC, isolated Au@Ag-RiTC NPs and coupled Au@Ag-RiTC NPs with different Ag shell thicknesses: 0 nm (a), 1.3 nm (b), 2.1 nm (c), 3.2 nm (d), 4.5 nm (e), and 5.6 nm (f).

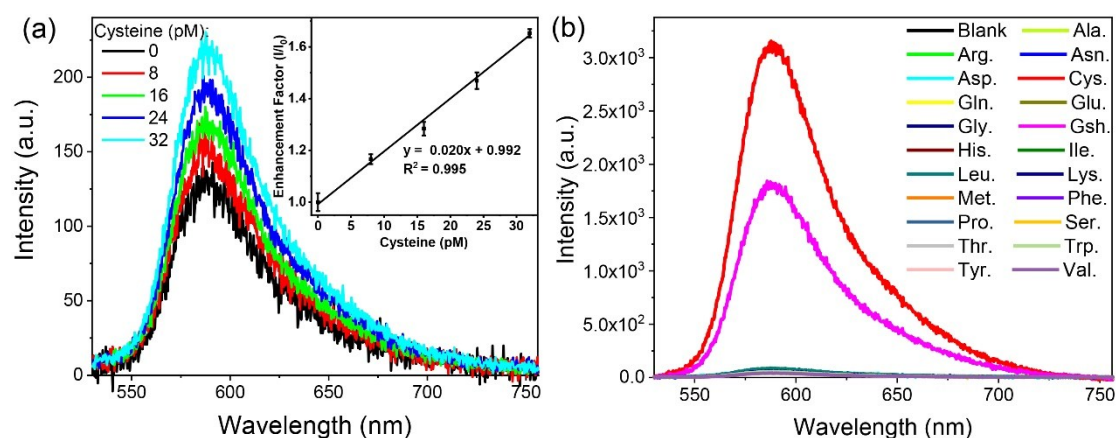

**Figure S8** (a) Fluorescence emission spectra of Au@Ag-RiTC NPs solution upon addition of different concentrations of cysteine in the low concentration range. Inset is the corresponding enhancement factor  $I/I_0$  versus [cysteine], where  $I_0$  and  $I$  represent the fluorescence intensity of Au@Ag-RiTC NPs without and with addition of cysteine. (b) Emission spectra of as-presented method to couple Au@Ag-RiTC NPs with addition of different coupling agents. All these measurements were conducted in the laboratory tap water.

**Table S1** Optimum enhancements factor of Coupled Au@Ag NPs with different Ag shell (0, 1.3, 2.1, 3.2, 4.5, and 5.6 nm) versus pre-quenched and free RiTC molecules

| Ag shell thickness (nm)  | 0    | 1.3  | 2.1  | 3.2  | 4.5  | 5.6  |
|--------------------------|------|------|------|------|------|------|
| Quenching ratio          | 8.1  | 5.8  | 4.6  | 5.6  | 5.8  | 5.9  |
| Compared to free RiTC    | 3.0  | 5.6  | 6.8  | 7.1  | 7.3  | 7.6  |
| Compared to pre-quenched | 24.3 | 32.0 | 31.3 | 39.6 | 42.8 | 44.8 |
